# Supplementary material for: The Conjugates of Indolo[2,3-b]quinoline as Anti-Pancreatic Cancer Agents: Design, Synthesis, Molecular Docking and Biological Evaluations
Source: MDPI journal article supplement (doi:10.3390/ijms25052573), 2024-02-22
Supplement: s1 [file s1]

## Supporting Information

# The conjugates of indolo[2,3-*b*]quinoline as anti-pancreatic cancer agents: design, synthesis, molecular docking and biological evaluations

Marcin Cybulski <sup>1</sup>, Katarzyna Sidoryk <sup>1</sup>, Magdalena Zaremba-Czogalla <sup>2</sup>, Bartosz Trzaskowski <sup>3</sup>, Marek Kubiszewski <sup>4</sup>, Joanna Tobiasz <sup>1</sup>, Anna Jaromin <sup>2</sup> and Olga Michalak <sup>1,\*</sup>

<sup>1</sup> Pharmacy, Cosmetic Chemistry and Biotechnology Research Group, Łukasiewicz Research Network-Industrial Chemistry Institute, Warsaw, Poland; marcin.cybulski@ichp.lukasiewicz.gov.pl (M.C.); k.sidoryk@pikralida.eu (K.S.); olga.michalak@ichp.lukasiewicz.gov.pl (O.M.)

<sup>2</sup> Department of Lipids and Liposomes, Faculty of Biotechnology, University of Wrocław, Wrocław, Poland; magdalena.zaremba-czogalla@uwr.edu.pl (M.Z.-C.); anna.jaromin@uwr.edu.pl (A.J.)

<sup>3</sup> Chemical and Biological Systems Simulation Lab, Center of New Technologies, University of Warsaw, Warsaw, Poland; b.trzaskowski@cent.uw.edu.pl

<sup>4</sup> Pharmaceutical Analysis Laboratory, Łukasiewicz Research Network-Industrial Chemistry Institute, Warsaw, Poland; marek.kubiszewski@ichp.lukasiewicz.gov.pl (M.K.)

\*Correspondence: olga.michalak@ichp.lukasiewicz.gov.pl

*In memory of Professor Łukasz S. Kaczmarek*

## TABLE OF CONTENTS

### *<sup>1</sup>H and <sup>13</sup>C NMR spectra*

**Figure S1.** <sup>1</sup>H and <sup>13</sup>C NMR spectra of 9-[(4-hydroxy)cinnamoyl]amino]-5,11-dimethyl-5H-indolo[2,3-*b*]quinoline (1)

**Figure S2.** <sup>1</sup>H and <sup>13</sup>C NMR spectra of 9-[(2-hydroxy)cinnamoyl]amino]-5,11-dimethyl-5H-indolo[2,3-*b*]quinoline (2)

**Figure S3.** <sup>1</sup>H and <sup>13</sup>C NMR spectra of 9-[(3-hydroxy)cinnamoyl]amino]-5,11-dimethyl-5H-indolo[2,3-*b*]quinoline (3)

**Figure S4.** <sup>1</sup>H and <sup>13</sup>C NMR spectra of 9-[(2,4-dihydroxy)cinnamoyl]amino]-5,11-dimethyl-5H-indolo[2,3-*b*]quinoline (4)

**Figure S5.** <sup>1</sup>H and <sup>13</sup>C NMR spectra of 9-[(3,4-dihydroxy)cinnamoyl]amino]-5,11-dimethyl-5H-indolo[2,3-*b*]quinoline (5)

**Figure S6.** <sup>1</sup>H and <sup>13</sup>C NMR spectra of 9-[(4-hydroxy)cinnamoyl]amino]-5,11-dimethyl-5H-indolo[2,3-*b*]quinoline (1) dihydrochloride

**Figure S7.** <sup>1</sup>H and <sup>13</sup>C NMR spectra of 9-[(2-hydroxy)cinnamoyl]amino]-5,11-dimethyl-5H-indolo[2,3-*b*]quinoline (2) dihydrochloride

**Figure S8.** <sup>1</sup>H and <sup>13</sup>C NMR spectra of 9-[(3-hydroxy)cinnamoyl]amino]-5,11-dimethyl-5H-indolo[2,3-*b*]quinoline (3) dihydrochloride

**Figure S9.** <sup>1</sup>H and <sup>13</sup>C NMR spectra of 9-[(2,4-dihydroxy)cinnamoyl]amino]-5,11-dimethyl-5H-indolo[2,3-*b*]quinoline (4) dihydrochloride

**Figure S10.**  $^1\text{H}$  and  $^{13}\text{C}$  NMR spectra of 9-[(3,4-dihydroxy)cinnamoyl]amino]-5,11-dimethyl-5H-indolo[2,3-b]quinoline (**5**) dihydrochloride

### *Computational studies*

**Table S1.** Selected, predicted ADMET properties of compounds investigated in this work.

**Table S2.** Selected, predicted ADMET properties of compounds investigated in this work.

**Figure S11.** Chart of probabilities for activities related to potential toxicity for compound **1**

**Figure S12.** Chart of probabilities for activities related to potential toxicity for compound **2**

**Figure S13.** Chart of probabilities for activities related to potential toxicity for compound **3**

**Figure S14.** Chart of probabilities for activities related to potential toxicity for compound **4**

**Figure S15.** Chart of probabilities for activities related to potential toxicity for compound **5**

**Figure S16.** Chart of probabilities for activities related to potential toxicity for DiMIQ (**6**).

**Figure S17.** Predicted sites of CYP450 metabolism for compounds **1-5** and DiMIQ.

### *HPLC stability test*

**Figure S18.** Stability of 9-[(4-hydroxy)cinnamoyl]amino]-5,11-dimethyl-5H-indolo[2,3-b]quinoline (**1**) dihydrochloride in DMSO solution at ambient temperature : **a**) at starting point "0" **b**) after 120 h

**Figure S19.** Stability of 9-[(2-hydroxy)cinnamoyl]amino]-5,11-dimethyl-5H-indolo[2,3-b]quinoline (**2**) dihydrochloride in DMSO solution at ambient temperature : **a**) at starting point "0" **b**) after 120 h

**HPLC Metod:** the chromatographic analysis was performed using a Waters HPLC system (Waters Assoc., Milford, MA, USA) consisting of two Waters pump 515, Waters autosampler 717-plus, Waters column oven and Photodiode Array Detector 2996. The Stationary phase – Symetry C-18 (250 × 4.6 mm, 5  $\mu\text{m}$ ). The mobile phase – A (0.1% TFA in acetonitrile) and B (0.1% TFA in water), elution – linear gradient, flow rate – 1 mL/min, duration time – 25 min. The other parameters: column temp. – 25°C, concentration of conjugates **1** and **2** – 0.05 mg/mL, injection volume – 40  $\mu\text{l}$ , UV detection wavelength  $\lambda = 330$  nm.

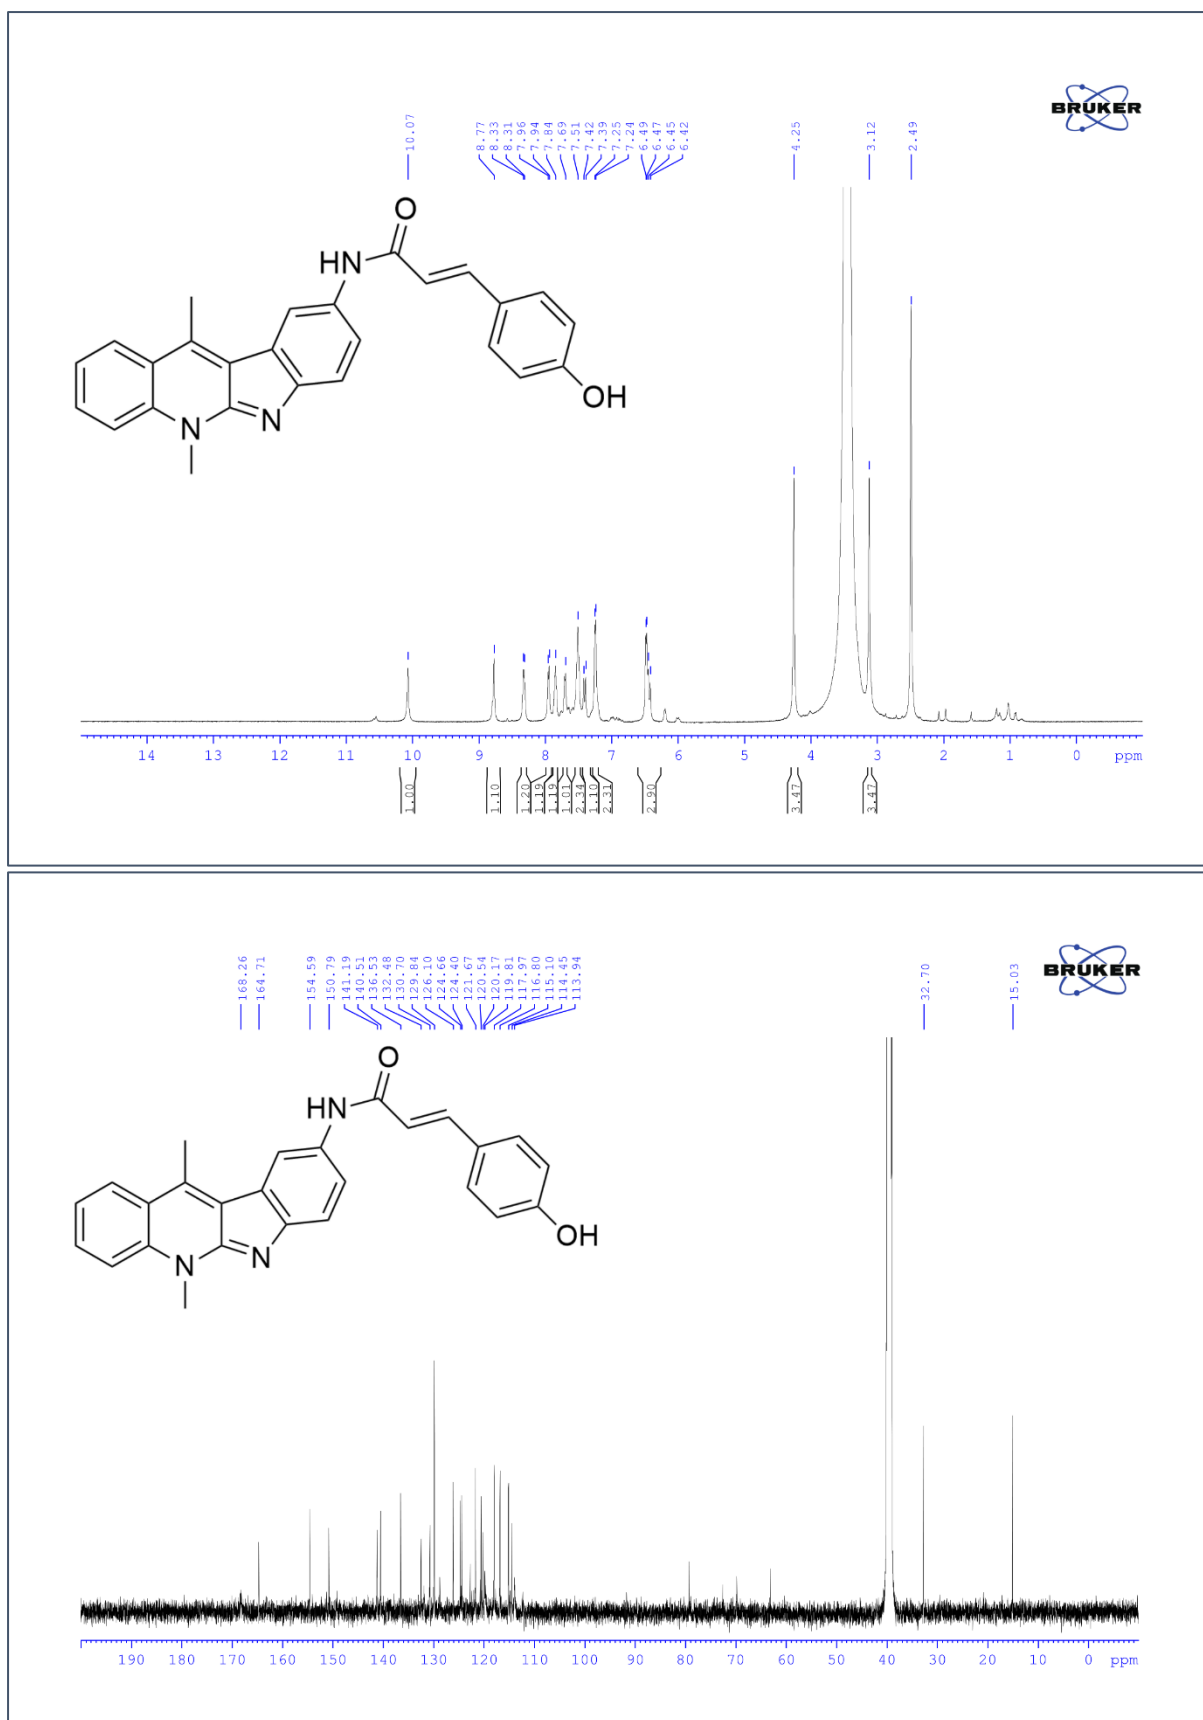

**Figure S1.** 9-(((4-hydroxy)cinnamoyl)amino)-5,11-dimethyl-5H-indolo[2,3-b]quinoline (1)

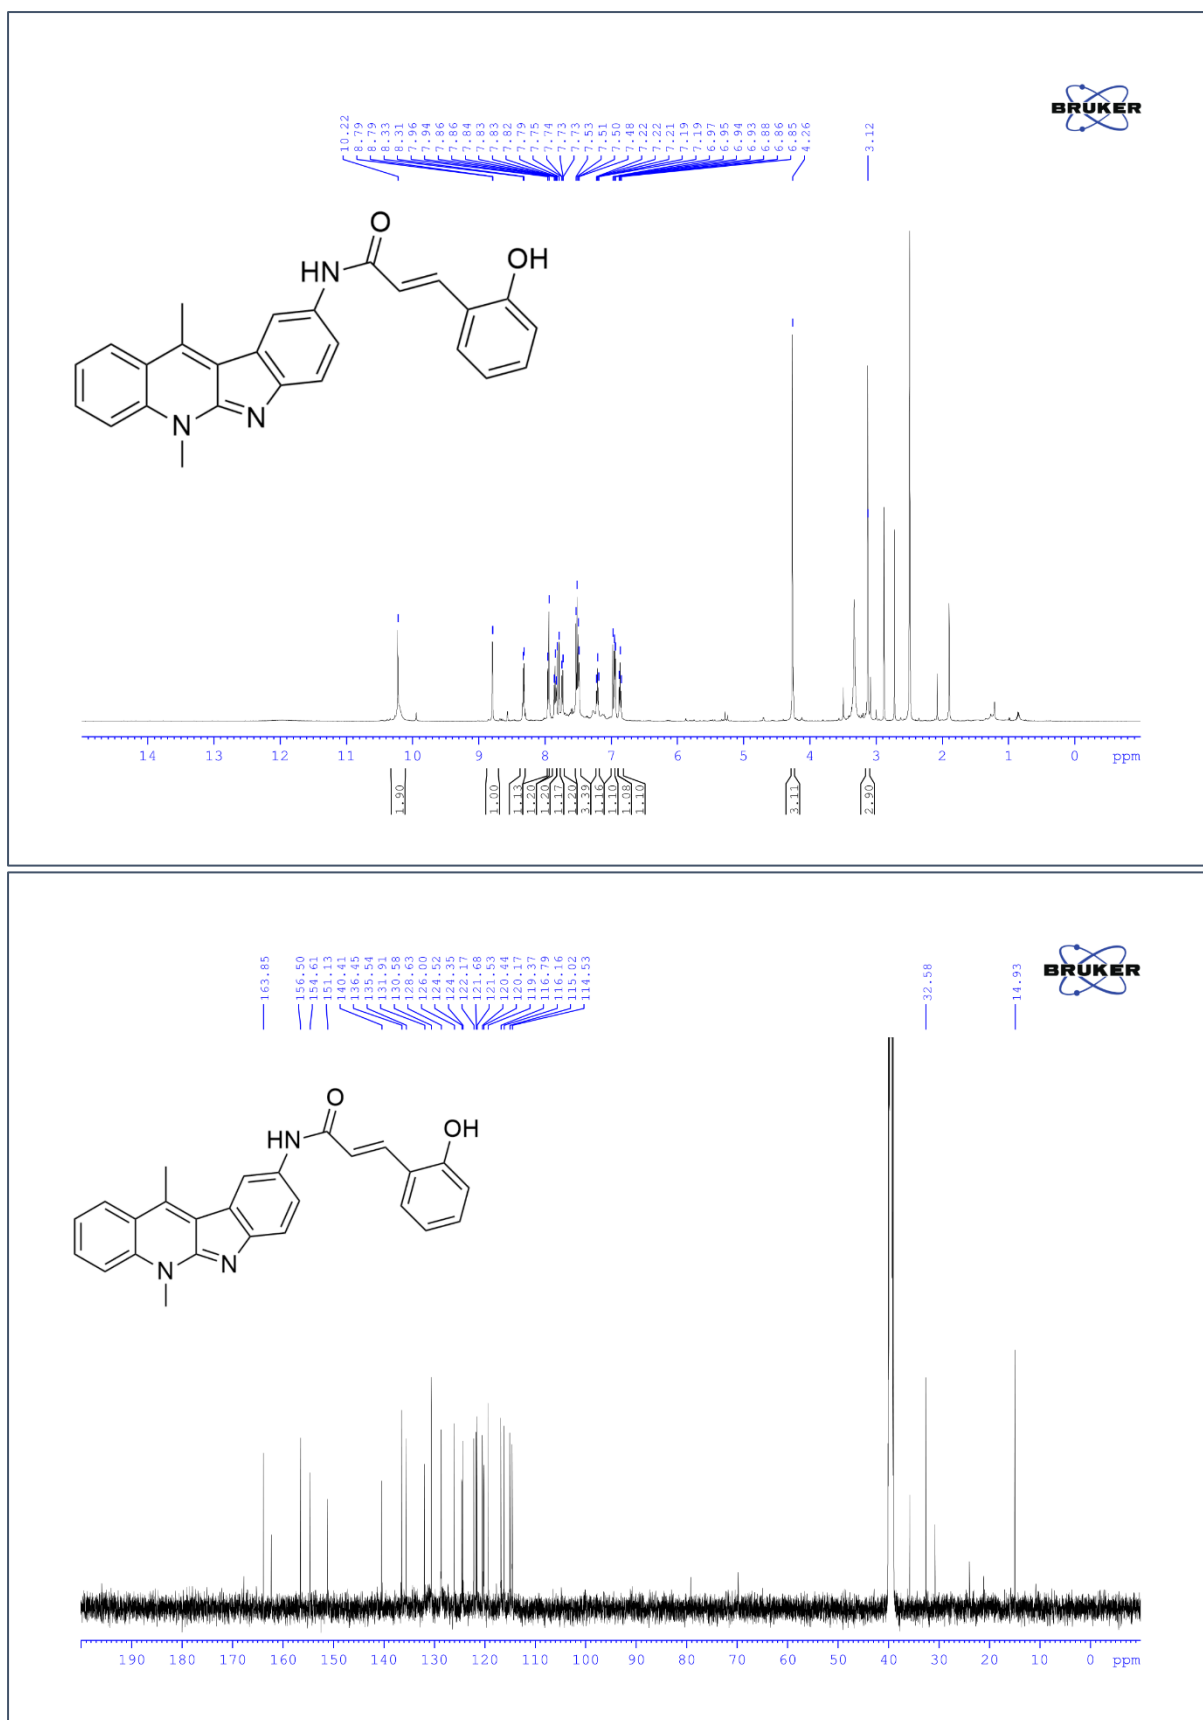

Figure S2. 9-(((2-hydroxy)cinnamoyl)amino)-5,11-dimethyl-5H-indolo[2,3-b]quinoline (2)

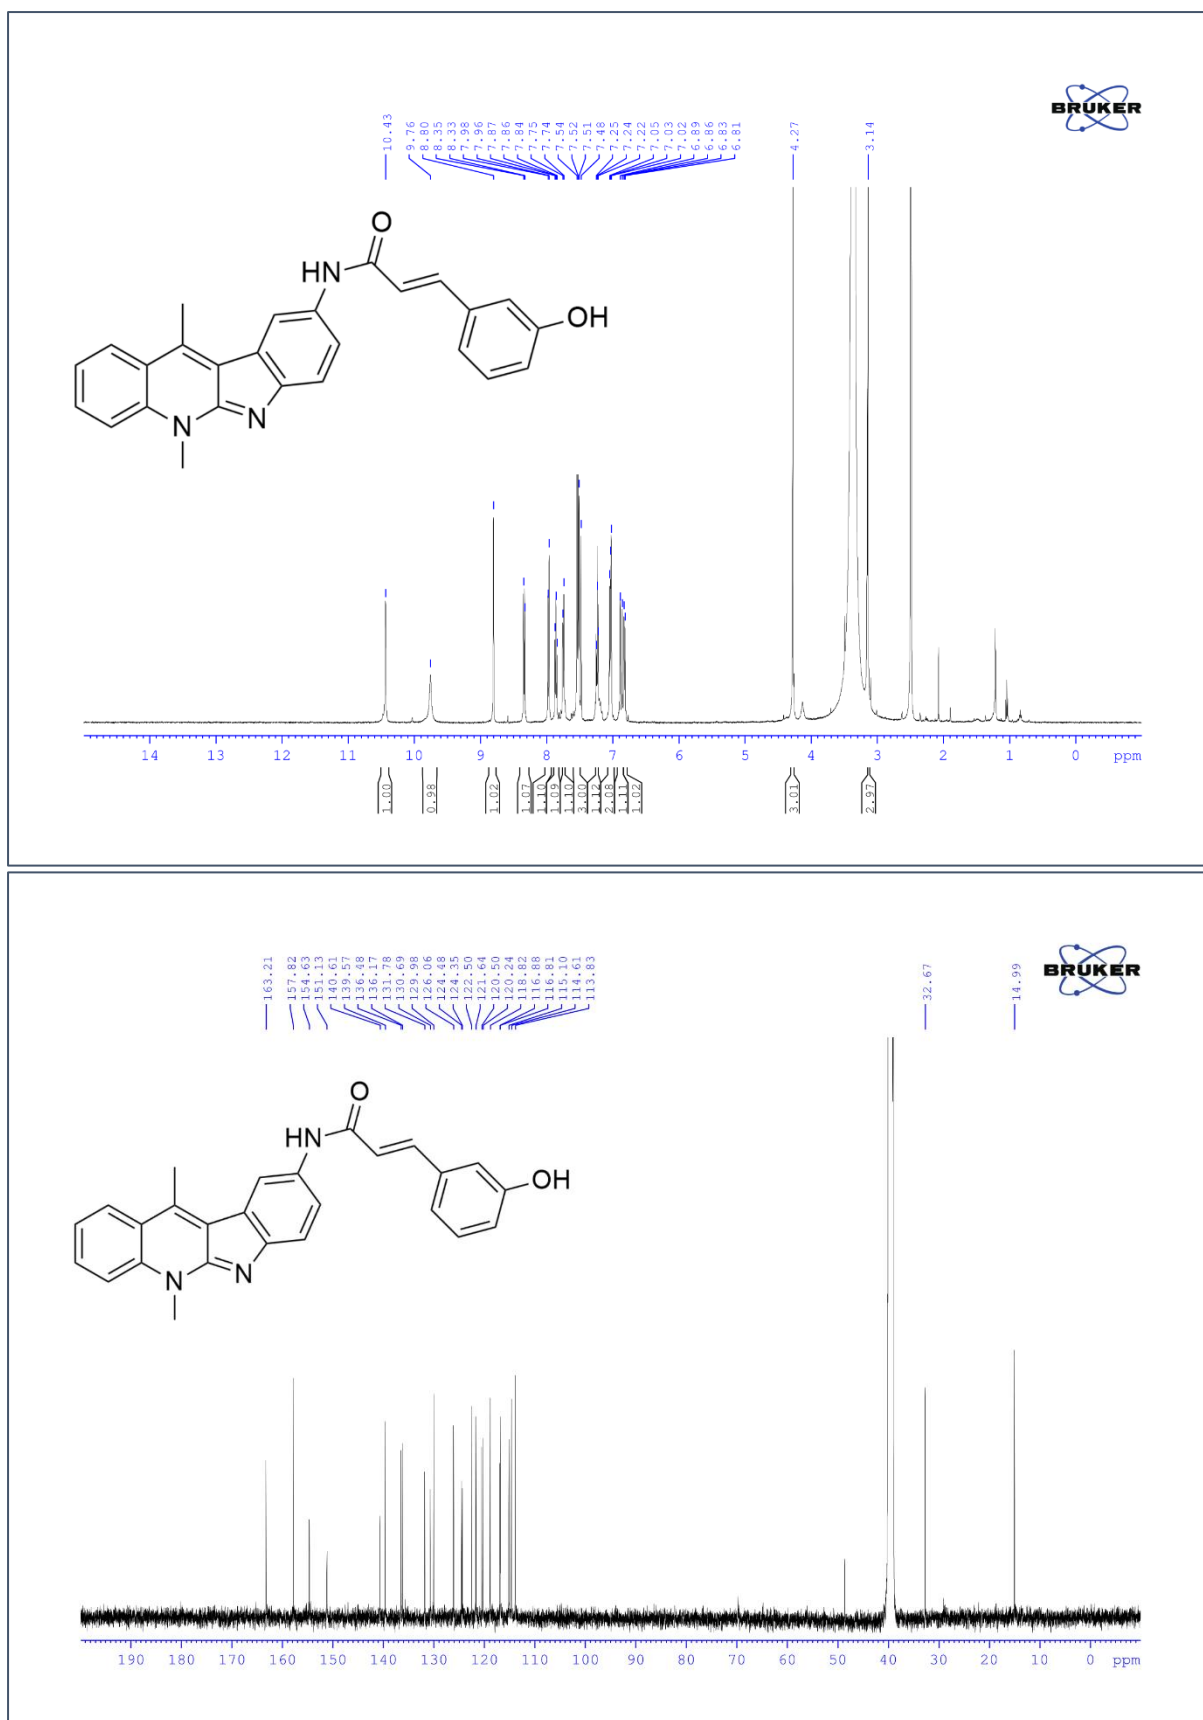

Figure S3. 9-(((3-hydroxy)cinnamoyl)amino)-5,11-dimethyl-5H-indolo[2,3-*b*]quinoline (3)

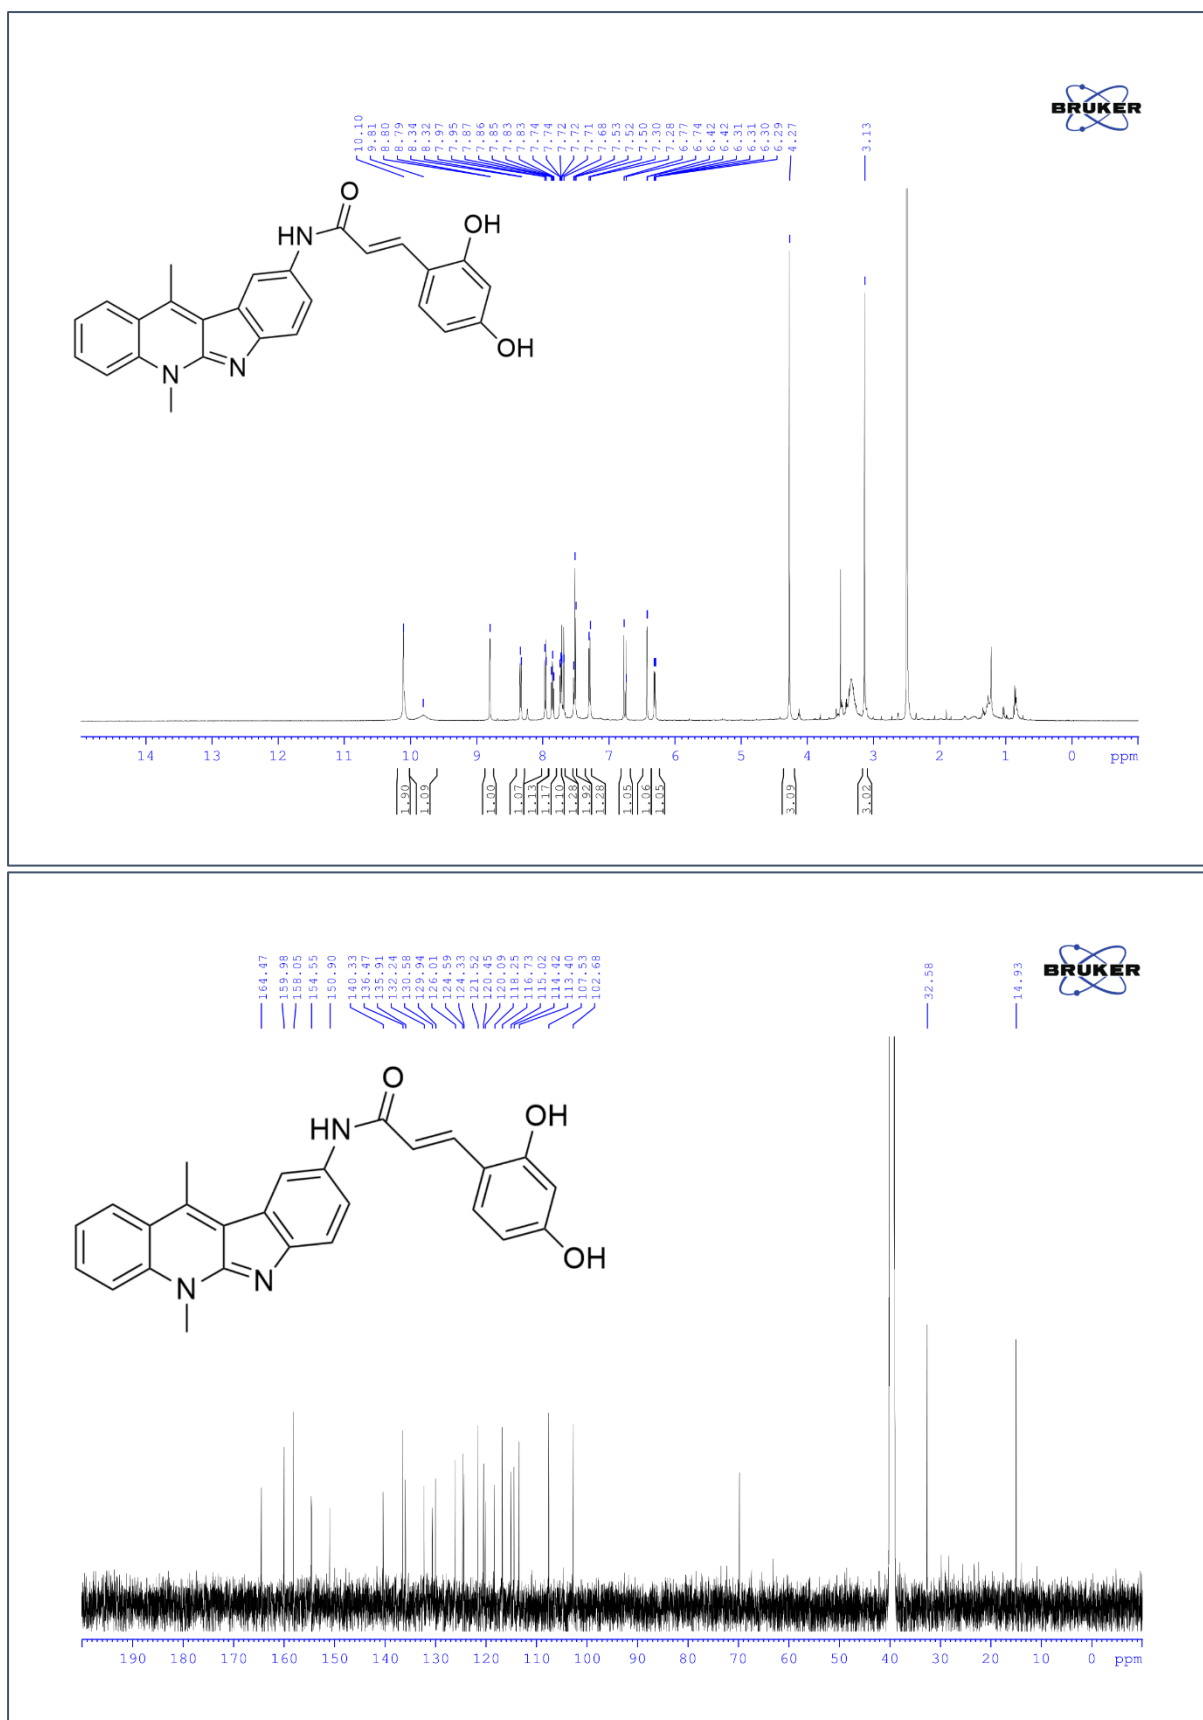

**Figure S4.** 9-[(2,4-dihydroxy)cinnamoyl]amino-5,11-dimethyl-5H-indolo[2,3-b]quinoline (**4**)

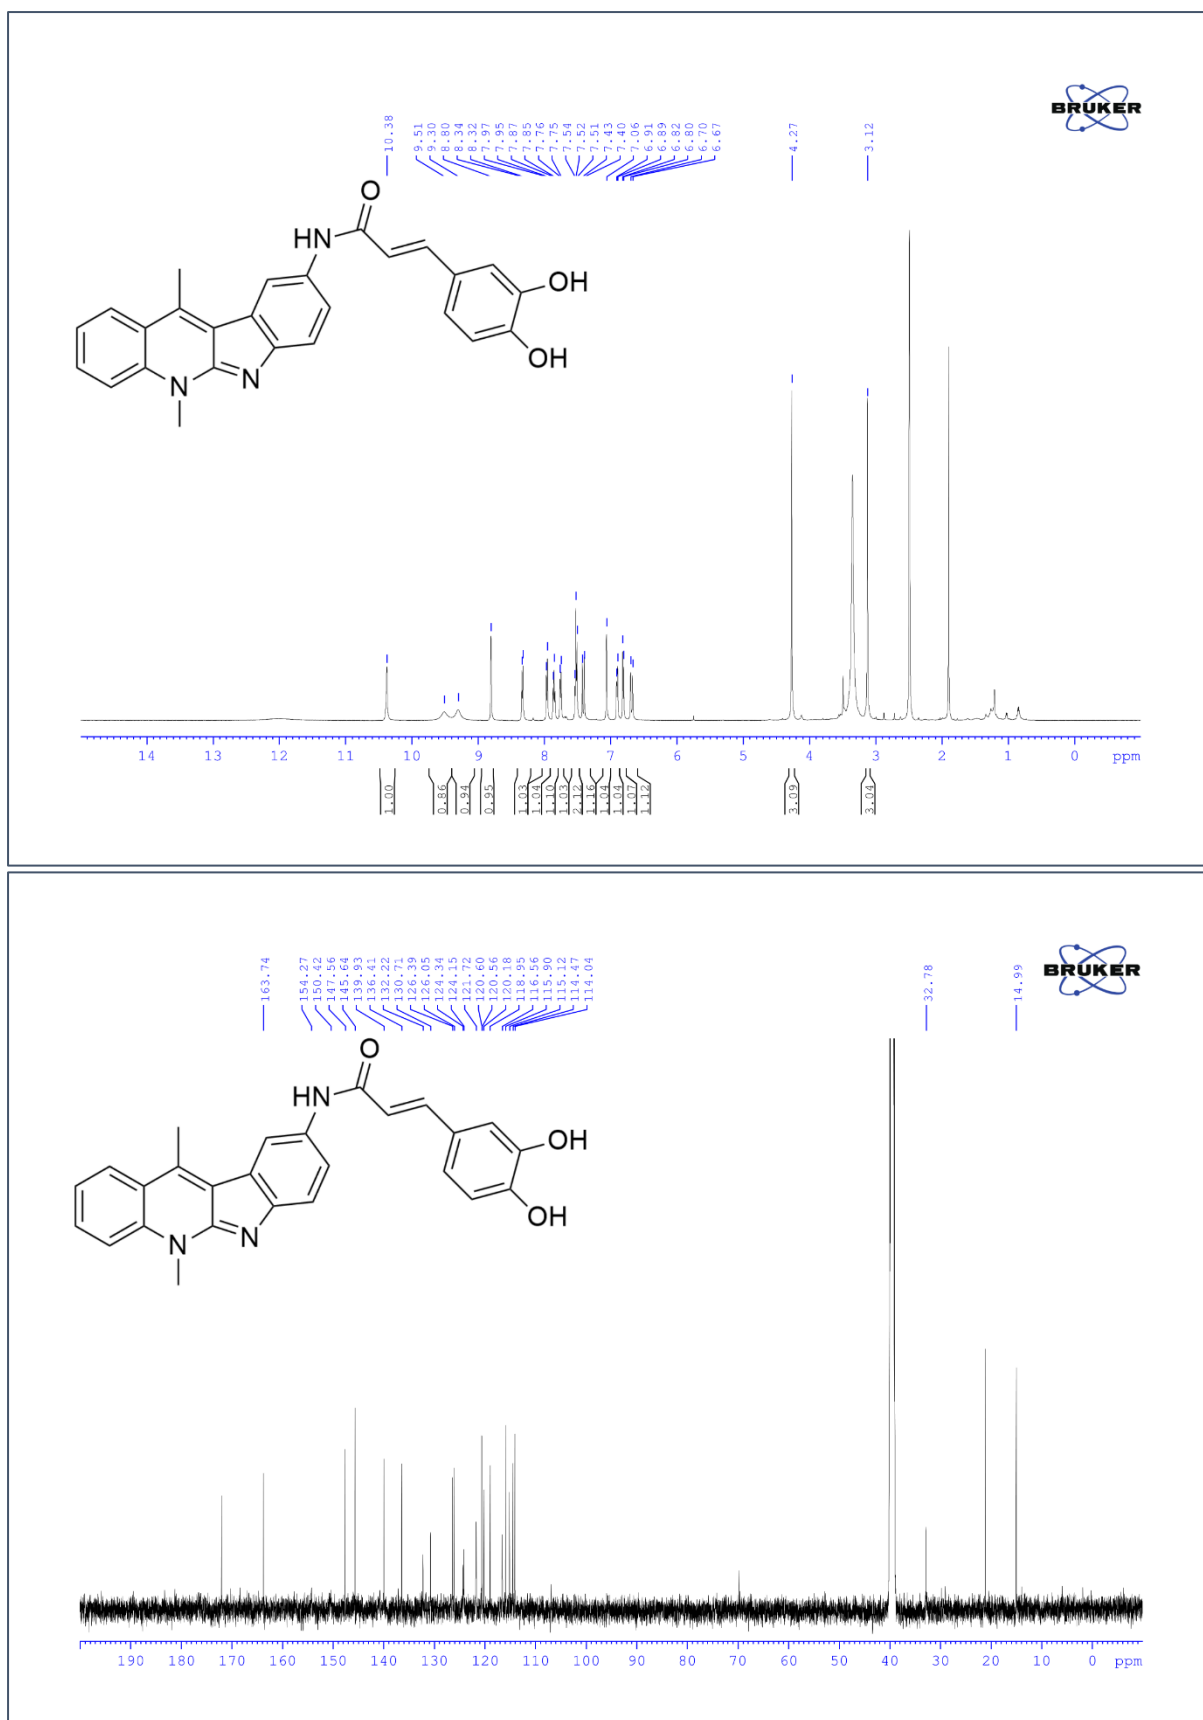

Figure S5. 9-[(3,4-dihydroxy)cinnamoyl]amino-5,11-dimethyl-5H-indolo[2,3-b]quinoline (5)

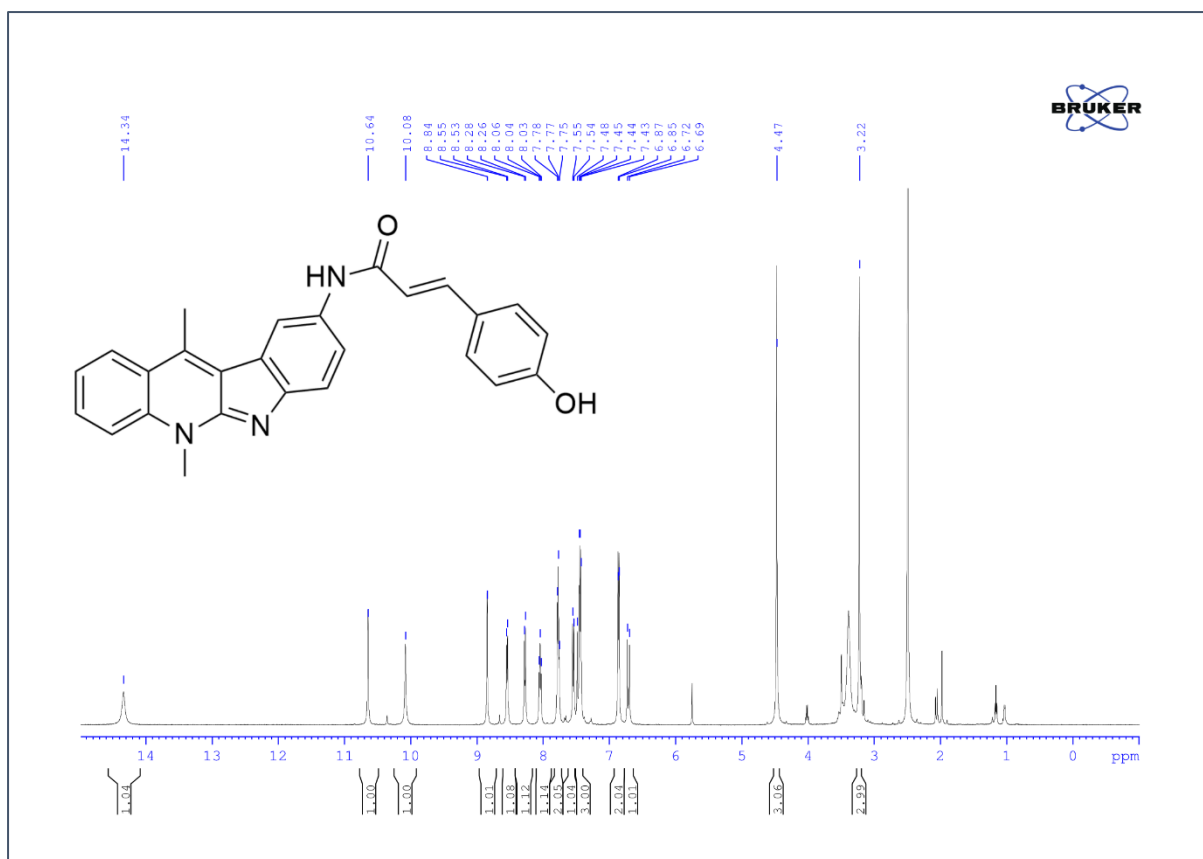

**Figure S6.** 9-(((4-hydroxy)cinnaomyl)amino)-5,11-dimethyl-5H-indolo[2,3-b]quinoline dihydrochloride (1)



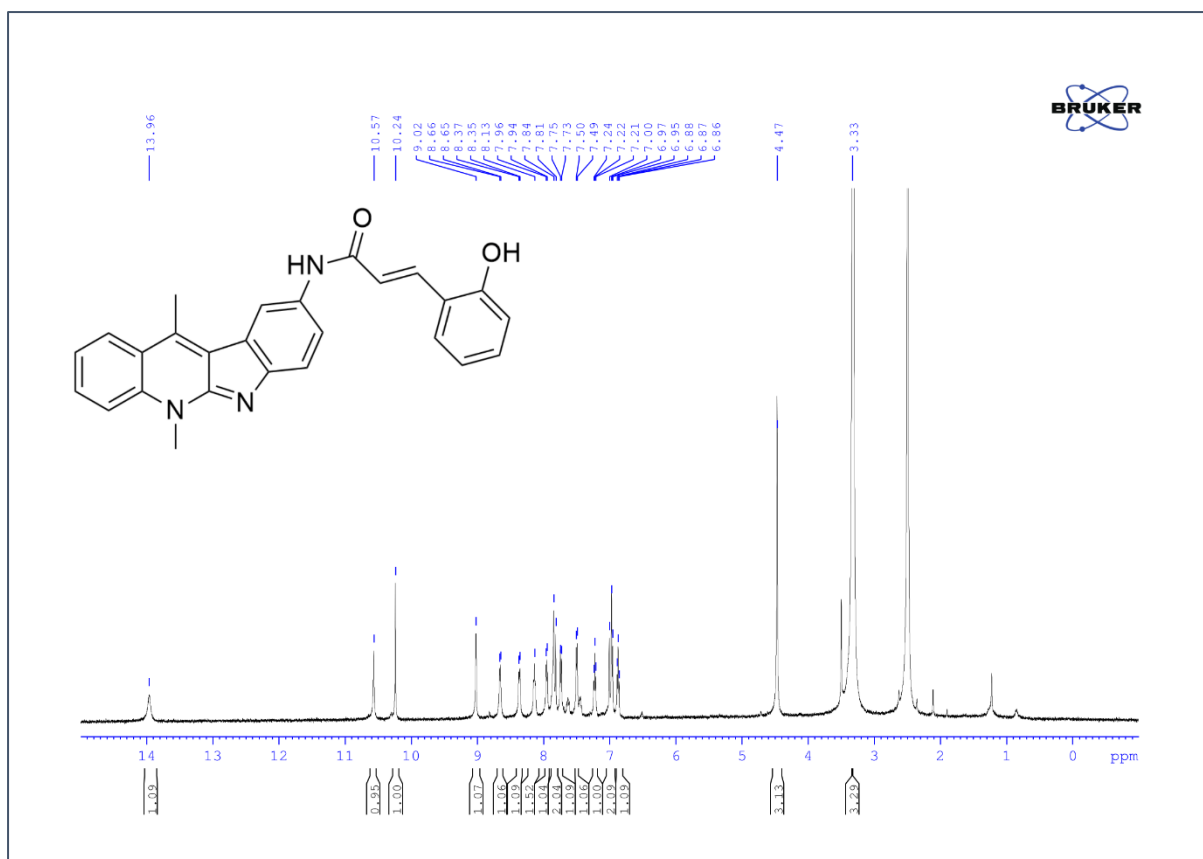

**Figure S7.** 9-[(2-hydroxy)cinnamoyl]amino]-5,11-dimethyl-5H-indolo[2,3-*b*]quinoline dihydrochloride (2)

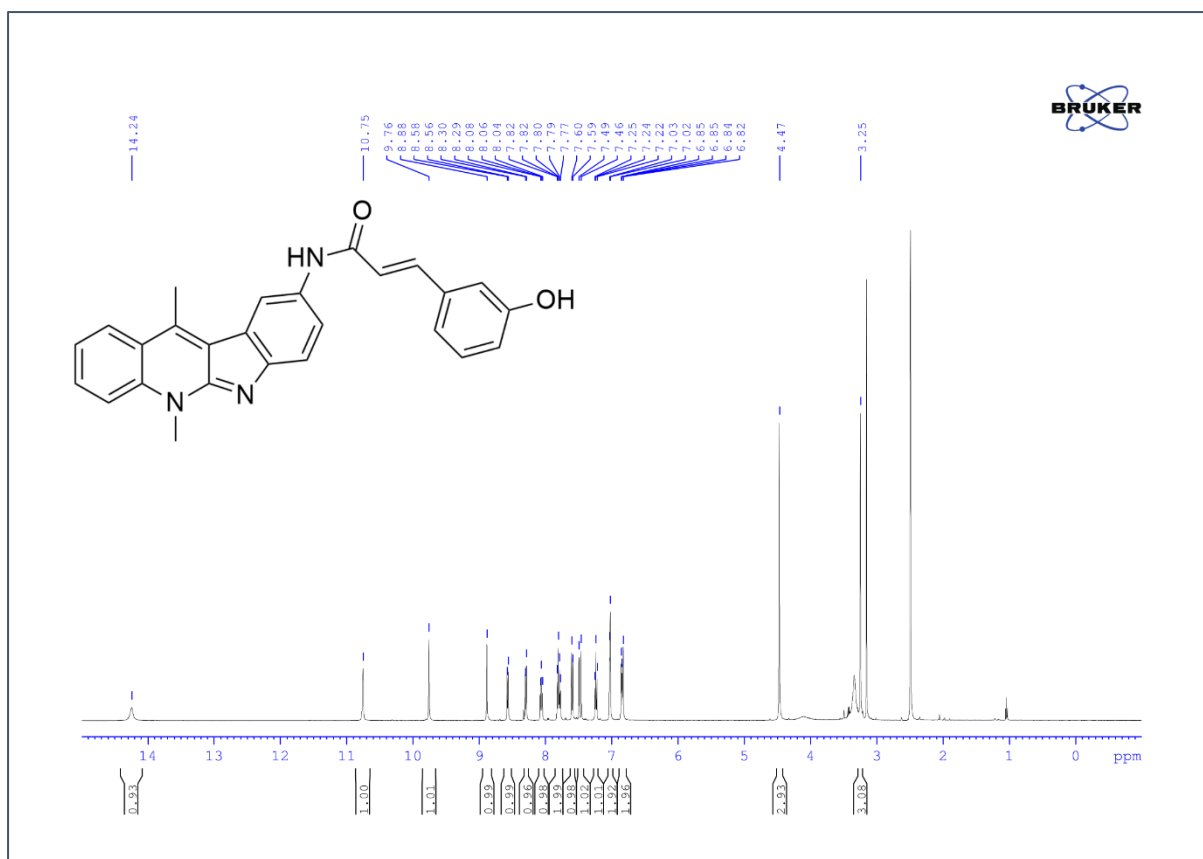

**Figure S8.** 9-[(3-hydroxy)cinnamoyl]amino]-5,11-dimethyl-5H-indolo[2,3-b]quinoline dihydrochloride (3)

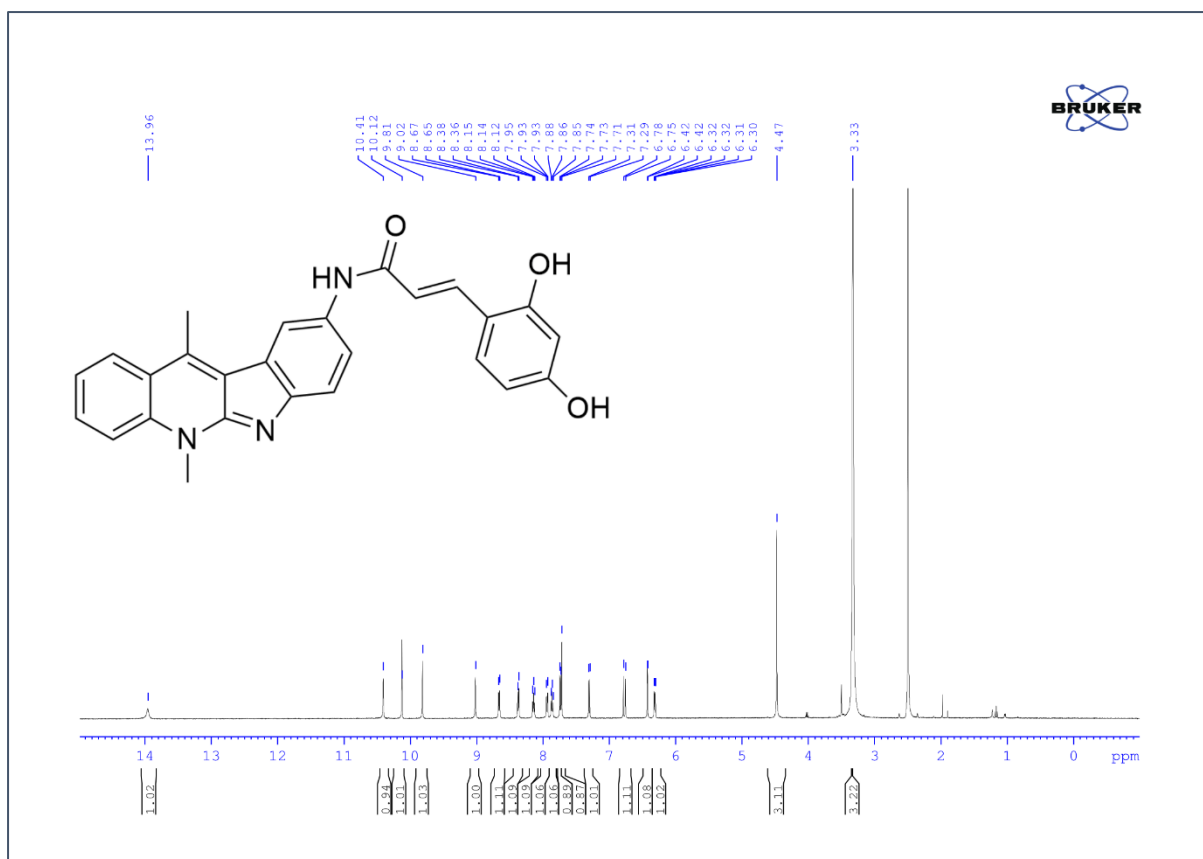

**Figure S9.** 9-[(2,4-dihydroxy)cinnamoyl]amino-5,11-dimethyl-5H-indolo[2,3-b]quinoline (4) dihydrochloride

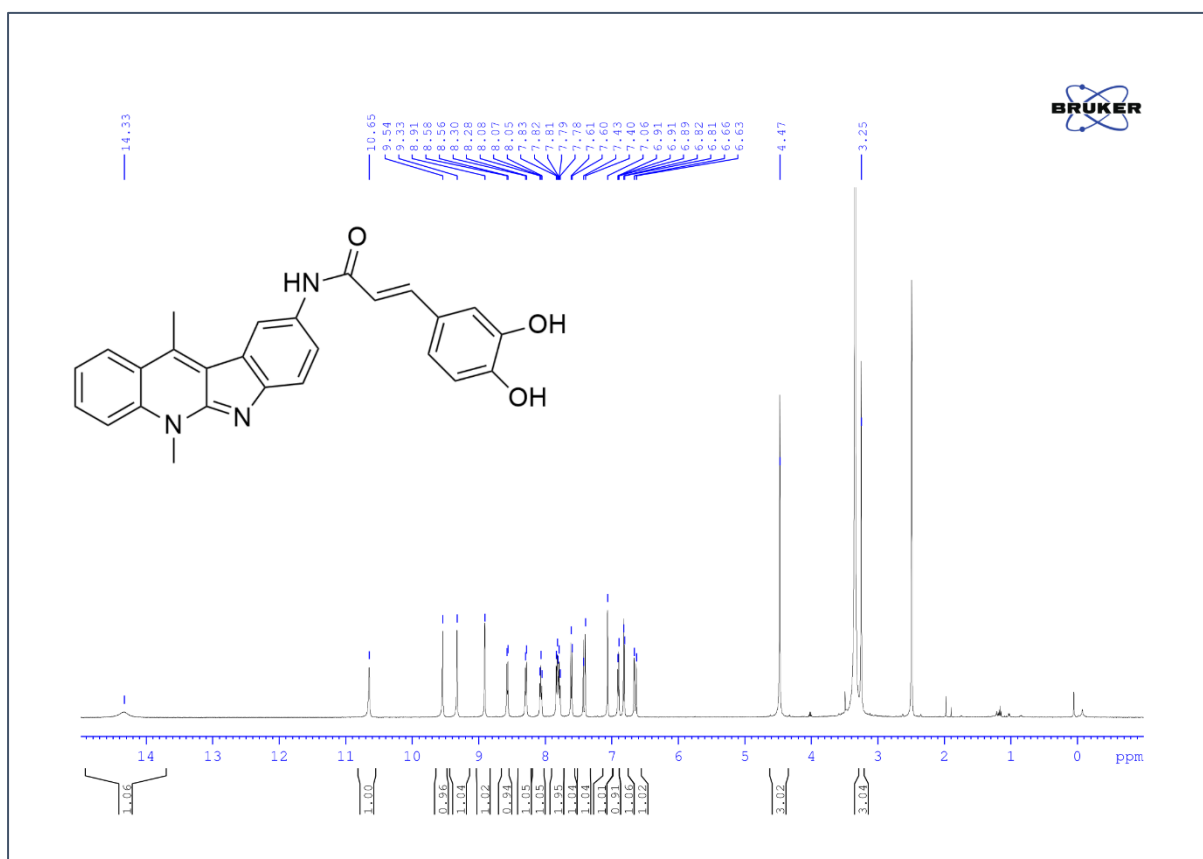

**Figure S10.** 9-[(3,4-dihydroxy)cinnamoyl]amino]-5,11-dimethyl-5H-indolo[2,3-b]quinoline (5) dihydrochloride

**Table S1.** Selected, predicted ADMET properties of compounds investigated in this work.

| compound  | MW <sup>a</sup> | dipole <sup>b</sup> | vol <sup>c</sup> | SASA <sup>d</sup> | dHB <sup>e</sup> | aHB <sup>f</sup> | logP <sup>g</sup> | logS <sup>h</sup> | metab <sup>i</sup> | P <sup>j</sup> | Ro3 <sup>k</sup> | Ro5 <sup>l</sup> |
|-----------|-----------------|---------------------|------------------|-------------------|------------------|------------------|-------------------|-------------------|--------------------|----------------|------------------|------------------|
| 1         | 407.5           | 12.7                | 1271.7           | 711.1             | 2                | 5.25             | 4.40              | -6.37             | 3                  | 435            | 1                | 0                |
| 2         | 407.5           | 13.2                | 1267.6           | 707.8             | 2                | 5.25             | 4.46              | -6.31             | 3                  | 534            | 1                | 0                |
| 3         | 407.5           | 12.0                | 1271.7           | 711.1             | 2                | 5.25             | 4.40              | -6.37             | 3                  | 435            | 1                | 0                |
| 4         | 423.5           | 8.7                 | 1290.6           | 720.2             | 3                | 6                | 3.69              | -5.99             | 4                  | 163            | 1                | 0                |
| 5         | 423.5           | 10.5                | 1292.7           | 721.9             | 3                | 6                | 3.69              | -6.01             | 4                  | 158            | 1                | 0                |
| DiMIQ (6) | 246.3           | 8.4                 | 815.1            | 474.1             | 0                | 2                | 3.89              | -4.15             | 2                  | 6597           | 0                | 0                |

<sup>a</sup>MW – molecular weight (Da); <sup>b</sup>dipole – dipole moment (D); <sup>c</sup>vol – total molecular volume (Å<sup>3</sup>); <sup>d</sup>SASA – solvent accessible surface (Å<sup>2</sup>); <sup>e</sup>dHB – estimated number of hydrogen bonds that would be donated by the solute to water molecules in an aqueous solution; <sup>f</sup>aHB – estimated number of hydrogen bonds that would be accepted by the solute from water molecules in an aqueous solution; <sup>g</sup>logP – octanol/water partition coefficient; <sup>h</sup>logS – predicted aqueous solubility (mol/dm<sup>3</sup>); <sup>i</sup>metab – number of likely metabolic reactions; <sup>j</sup>P – apparent Caco-2 permeability (nm/sec); <sup>k</sup>Ro3 – number of violations of Jorgensen's rule of three; <sup>l</sup>Ro5 – number of violations of Lipinski's rule of five.

**Table S2.** Selected, predicted ADMET properties of compounds investigated in this work.

| compound  | FOSA <sup>a</sup> | FISA <sup>b</sup> | PISA <sup>c</sup> | glob <sup>d</sup> | HERG <sup>e</sup> | BB <sup>f</sup> | MDCK <sup>g</sup> | K <sub>p</sub> <sup>h</sup> | HSA <sup>i</sup> | J <sub>m</sub> <sup>j</sup> | LD <sub>50</sub> <sup>k</sup> |
|-----------|-------------------|-------------------|-------------------|-------------------|-------------------|-----------------|-------------------|-----------------------------|------------------|-----------------------------|-------------------------------|
| 1         | 146.1             | 143.1             | 421.9             | 0.80              | -6.81             | -1.24           | 201.4             | -2.19                       | 0.78             | 0.001                       | 680                           |
| 2         | 141.8             | 133.7             | 432.3             | 0.80              | -6.82             | -1.13           | 251.4             | -1.98                       | 0.77             | 0.002                       | 680                           |
| 3         | 146.1             | 143.2             | 421.9             | 0.80              | -6.81             | -1.24           | 201.0             | -2.19                       | 0.78             | 0.001                       | 680                           |
| 4         | 141.8             | 188.1             | 390.4             | 0.80              | -6.70             | -1.78           | 69.7              | -3.03                       | 0.58             | 0.000                       | 680                           |
| 5         | 146.1             | 189.6             | 386.2             | 0.79              | -6.69             | -1.80           | 67.2              | -3.08                       | 0.58             | 0.000                       | 10000                         |
| DiMIQ (6) | 132.7             | 18.6              | 322.8             | 0.89              | -4.85             | 0.41            | 3801.3            | -0.73                       | 0.45             | 3.252                       | 330                           |

<sup>a</sup>FOSA – hydrophobic component of the SASA; <sup>b</sup>FISA – hydrophilic component of the SASA; <sup>c</sup>PISA –  $\pi$  (carbon and attached hydrogen) component of the SASA; <sup>d</sup>glob – globularity descriptor; <sup>e</sup>HERG – predicted IC<sub>50</sub> value for blockage of HERG K<sup>+</sup> channels; <sup>f</sup>BB – predicted brain/blood partition coefficient; <sup>g</sup>MDCK – predicted apparent MDCK cell permeability (nm/sec); <sup>h</sup>K<sub>p</sub> – predicted skin permeability; <sup>i</sup>HSA – prediction of binding to human serum albumin; <sup>j</sup>J<sub>m</sub> – Predicted maximum transdermal transport rate ( $\mu\text{g cm}^{-2} \text{ hr}^{-1}$ ); <sup>k</sup>LD<sub>50</sub> – predicted value of median lethal dose (mg/kg).

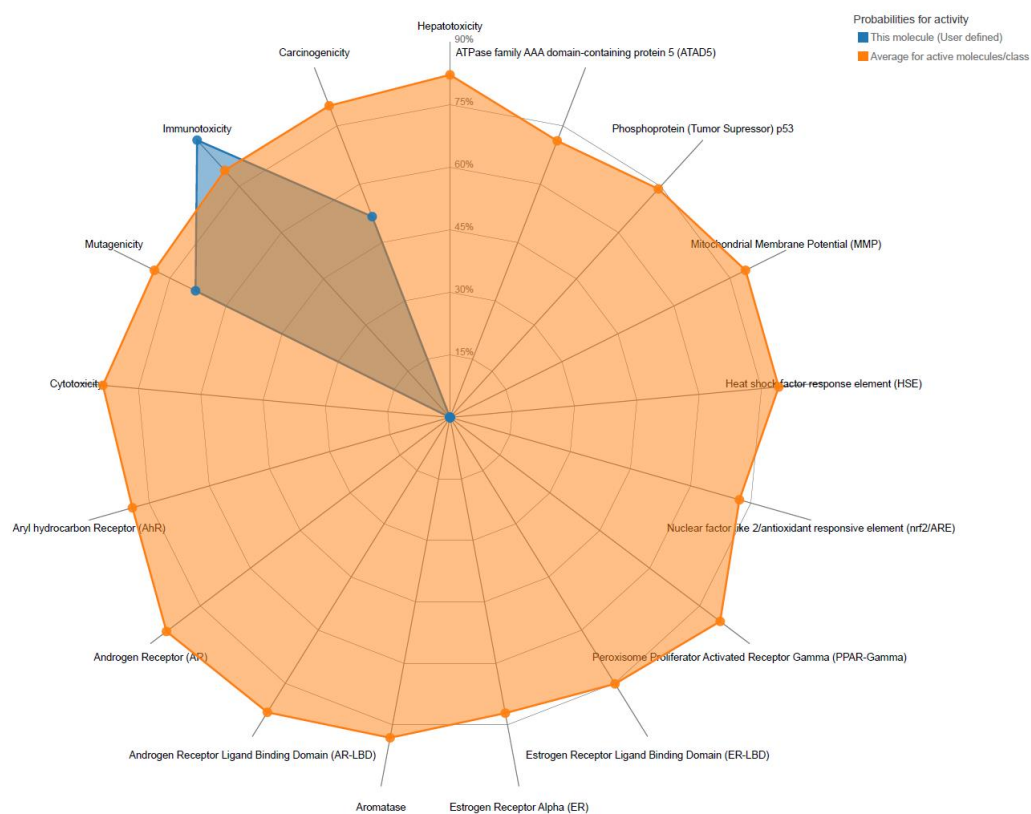

**Figure S11.** Chart of probabilities for activities related to potential toxicity for compound 1.

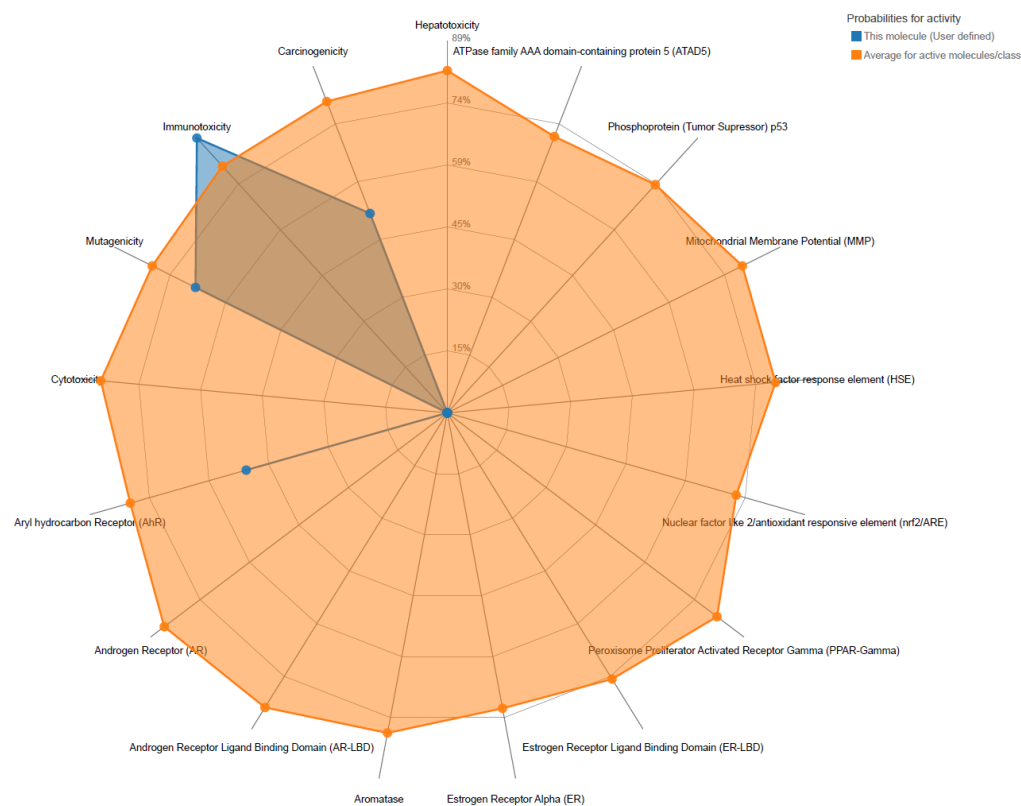

**Figure S12.** Chart of probabilities for activities related to potential toxicity for compound 2.

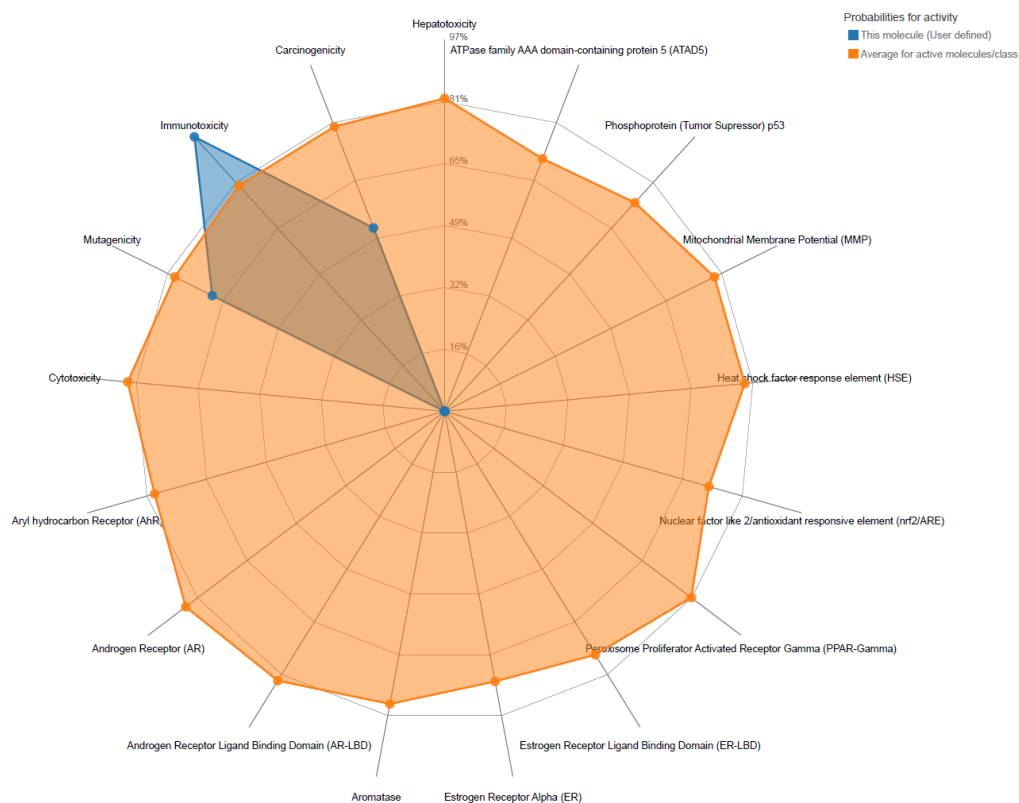

**Figure S13.** Chart of probabilities for activities related to potential toxicity for compound 3.

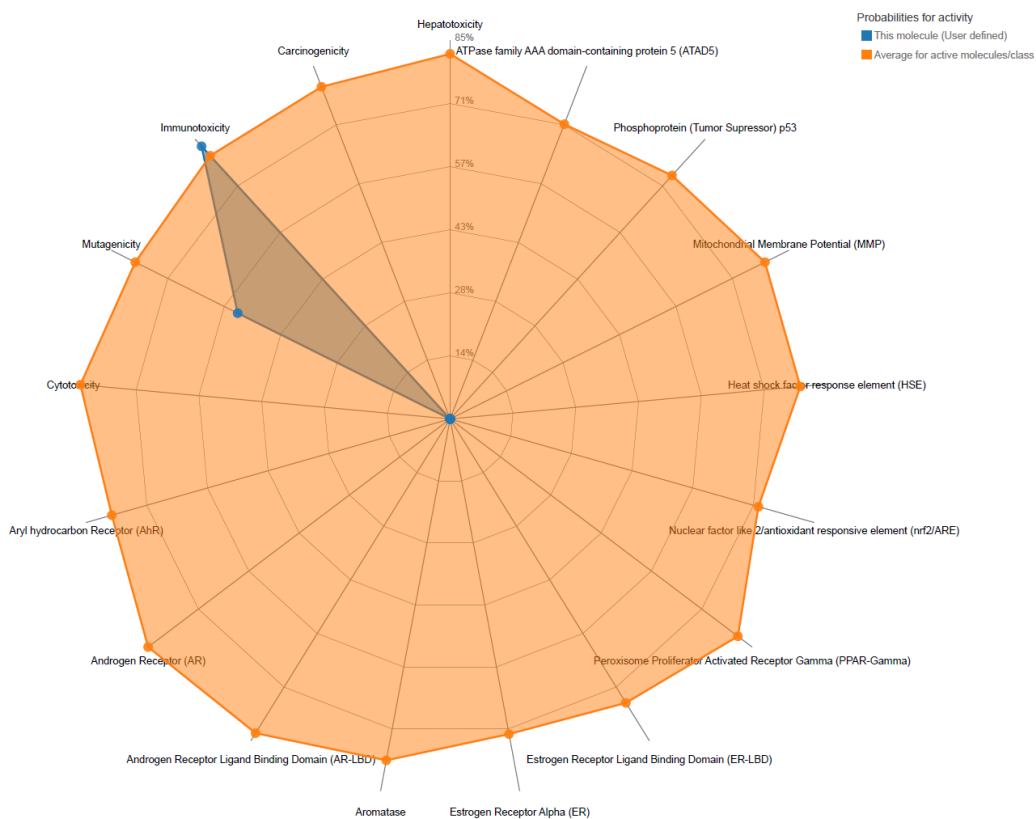

**Figure S14.** Chart of probabilities for activities related to potential toxicity for compound 4.

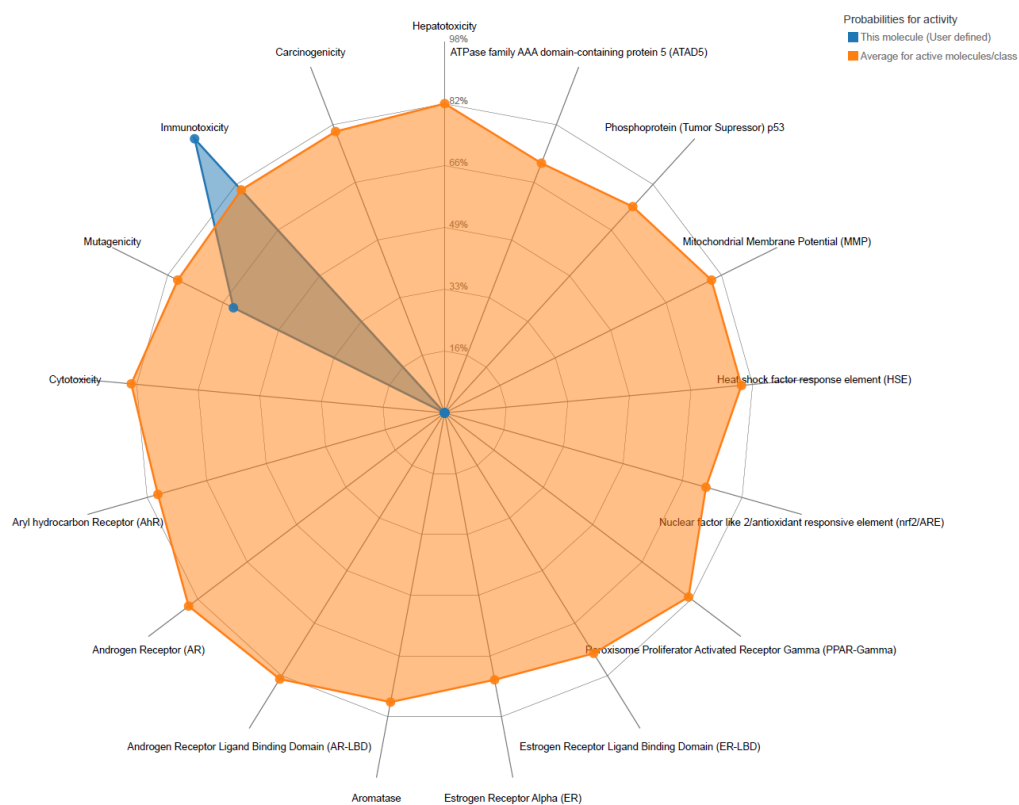

**Figure S15.** Chart of probabilities for activities related to potential toxicity for compound 5.

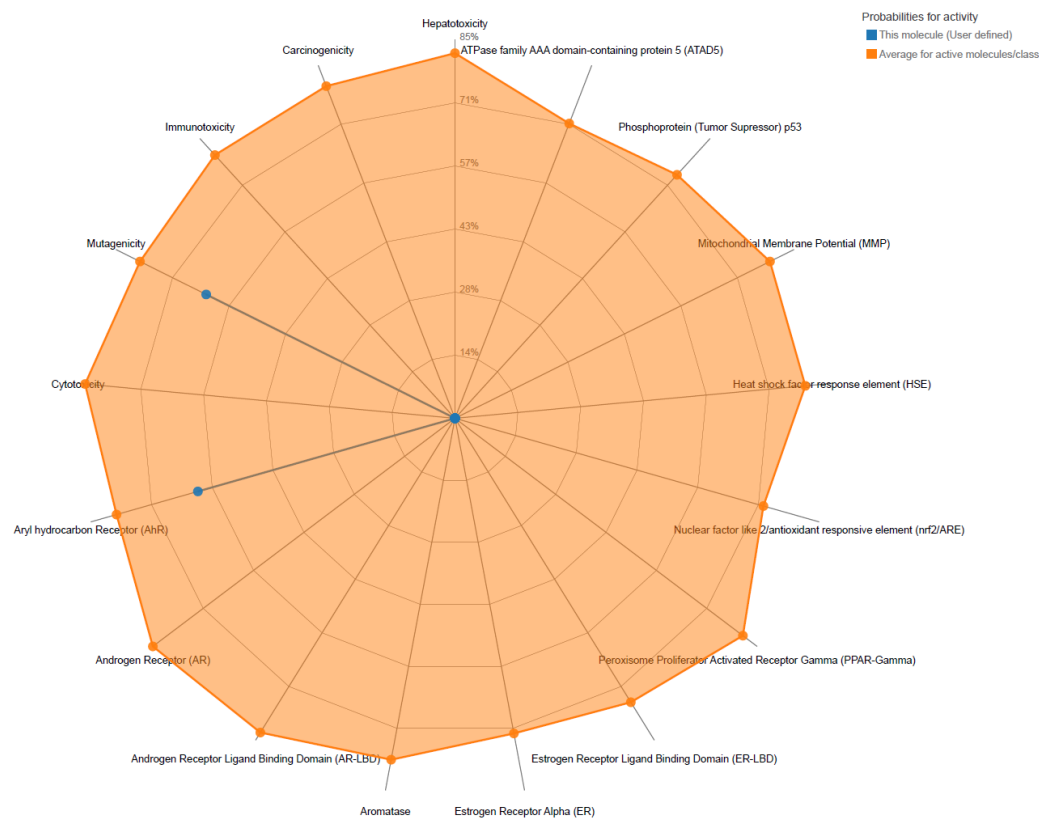

**Figure S16.** Chart of probabilities for activities related to potential toxicity for DiMIQ.



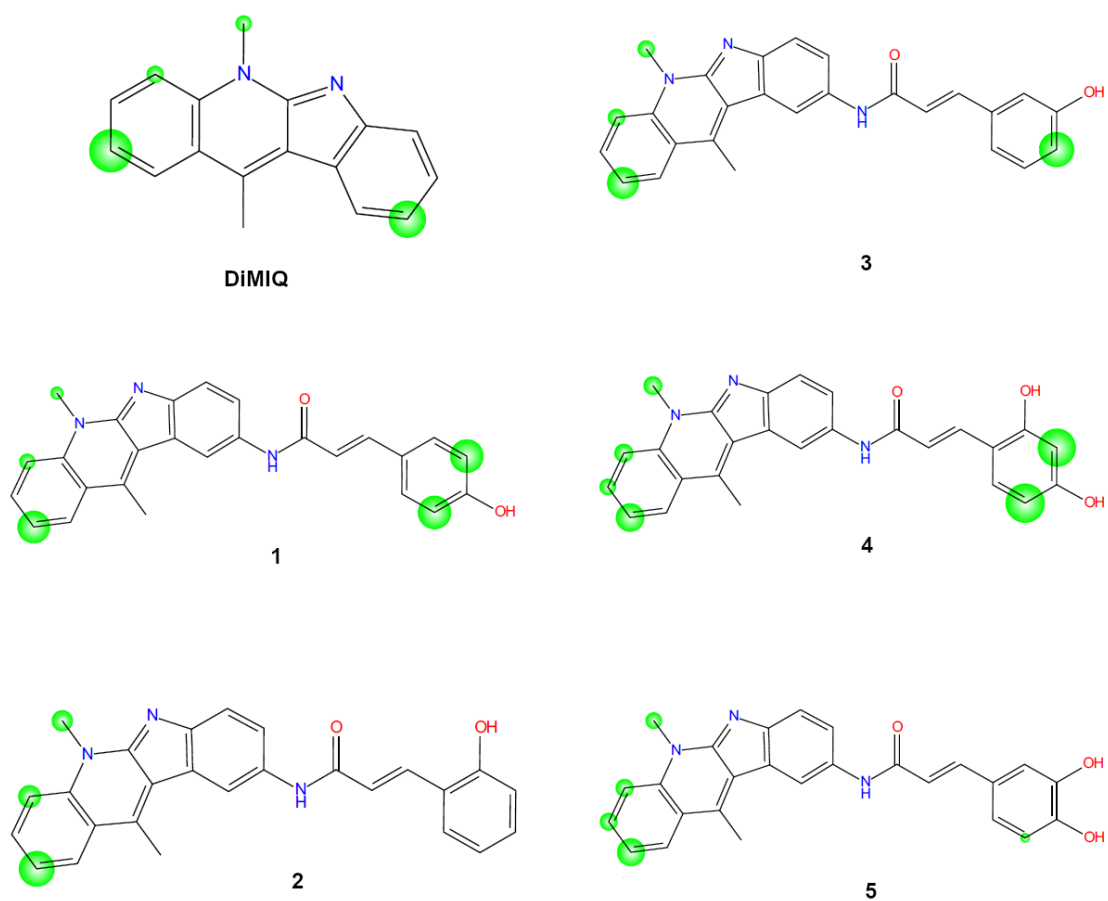

**Figure S17.** Predicted sites of CYP450 metabolism for compounds 1-5 and DiMIQ.

| SAMPLE INFORMATION |                              |                     |                                              |
|--------------------|------------------------------|---------------------|----------------------------------------------|
| Sample Name:       | Conjugate 1 HCl DMSO "0" (3) | Acquired By:        | tobiaszj                                     |
| Sample Type:       | Unknown                      | Acq. Method Set:    | Indolochinoliny                              |
| Vial:              | 8                            | Processing Method:  | Indolochinoliny Con 1                        |
| Injection #:       | 1                            | Channel Name:       | 330 nm                                       |
| Injection Volume:  | 40,00 ul                     | Proc. Chnl. Descr.: | [PDA 330,0 nm] - Labeled:                    |
| Run Time:          | 25,0 Minutes                 |                     | Blank[330] (PDA 190.0 to 800.0 nm at 1.2 nm) |

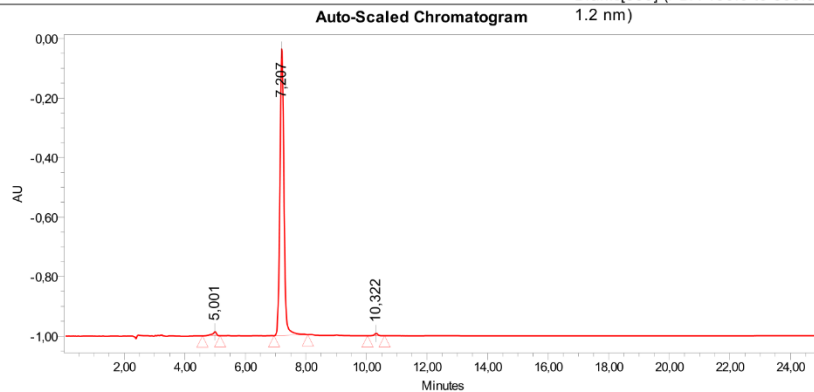

**Peak Results**

| Name | RT     | Area    | % Area | Symmetry Factor | Baseline Start (min) | Baseline End (min) | Selectivity | Resolution |
|------|--------|---------|--------|-----------------|----------------------|--------------------|-------------|------------|
| 1    | 5,001  | 139651  | 1,52   | 0,682992        | 4,583                | 5,167              |             |            |
| 2    | 7,207  | 8966050 | 97,78  | 1,069331        | 6,950                | 8,067              | 1,551       | 9,734574   |
| 3    | 10,322 | 64042   | 0,70   | 0,918081        | 10,033               | 10,600             | 1,502       | 13,876856  |

a)

| SAMPLE INFORMATION |                                  |                     |                                                |
|--------------------|----------------------------------|---------------------|------------------------------------------------|
| Sample Name:       | Conjugate 1 HCl DMSO 120h RT (3) | Acquired By:        | tobiaszj                                       |
| Sample Type:       | Unknown                          | Acq. Method Set:    | Indolochinoliny                                |
| Vial:              | 4                                | Processing Method:  | Indolochinoliny Con 1                          |
| Injection #:       | 1                                | Channel Name:       | 330 nm                                         |
| Injection Volume:  | 40,00 ul                         | Proc. Chnl. Descr.: | PDA 330,0 nm (PDA 190.0 to 800.0 nm at 1.2 nm) |
| Run Time:          | 25,0 Minutes                     |                     |                                                |

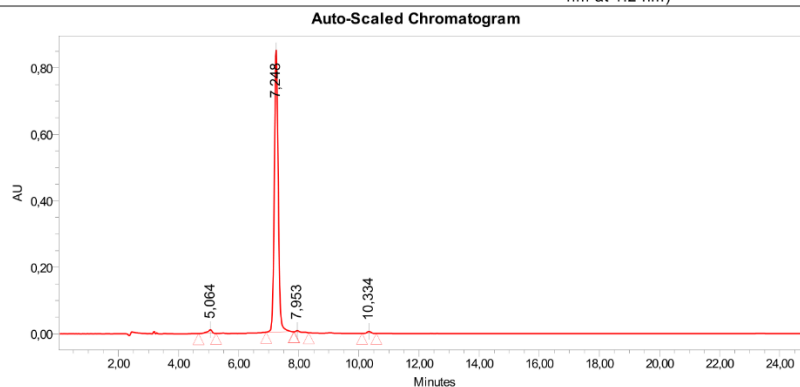

**Peak Results**

| Name | RT     | Area    | % Area | Symmetry Factor | Baseline Start (min) | Baseline End (min) | Selectivity | Resolution |
|------|--------|---------|--------|-----------------|----------------------|--------------------|-------------|------------|
| 1    | 5,064  | 122377  | 1,55   | 0,701518        | 4,667                | 5,250              |             |            |
| 2    | 7,248  | 7670360 | 97,36  | 1,077603        | 6,917                | 7,833              | 1,537       | 9,148555   |
| 3    | 7,953  | 31429   | 0,40   | 2,347202        | 7,850                | 8,333              | 1,113       | 3,040656   |
| 4    | 10,334 | 54244   | 0,69   | 0,995788        | 10,100               | 10,583             | 1,343       | 10,271641  |

b)

**Figure S18.** Stability of 9-[(4-hydroxy)cinnamoyl]amino]-5,11-dimethyl-5*H*-indolo[2,3-*b*]quinoline (1) dihydrochloride in DMSO solution at ambient temperature : **a)** at starting point "0" **b)** after 120 h

| SAMPLE INFORMATION |                              |                     |                                                |
|--------------------|------------------------------|---------------------|------------------------------------------------|
| Sample Name:       | Conjugate 2 HCl DMSO "0" (2) | Acquired By:        | tobiaszj                                       |
| Sample Type:       | Unknown                      | Acq. Method Set:    | Indolochinoliny                                |
| Vial:              | 13                           | Processing Method:  | Indolochinoliny Con 2                          |
| Injection #:       | 1                            | Channel Name:       | 330 nm                                         |
| Injection Volume:  | 40,00 ul                     | Proc. Chnl. Descr.: | PDA 330,0 nm (PDA 190.0 to 800.0 nm at 1.2 nm) |
| Run Time:          | 25,0 Minutes                 |                     |                                                |

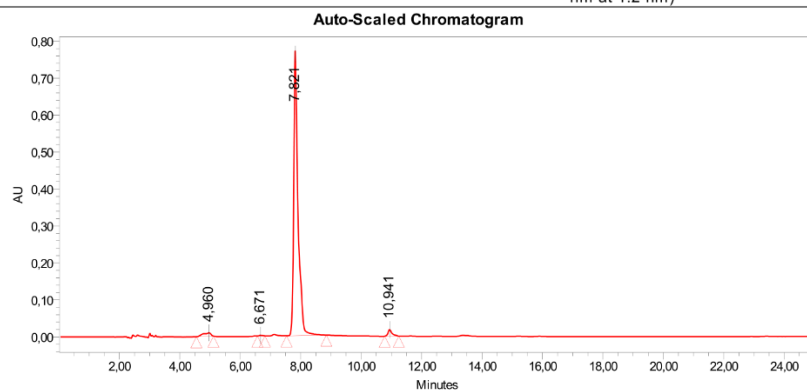

**Peak Results**

|   | Name | RT     | Area    | % Area | SymmetryFactor | Baseline Start (min) | Baseline End (min) | Selectivity | Resolution |
|---|------|--------|---------|--------|----------------|----------------------|--------------------|-------------|------------|
| 1 |      | 4,960  | 174032  | 2,20   | 0,685754       | 4,550                | 5,117              |             |            |
| 2 |      | 6,671  | 9794    | 0,12   | 1,278447       | 6,567                | 6,817              | 1,432       | 4,553160   |
| 3 |      | 7,821  | 7568744 | 95,59  | 1,592467       | 7,533                | 8,850              | 1,203       | 5,772222   |
| 4 |      | 10,941 | 165354  | 2,09   | 1,536011       | 10,783               | 11,250             | 1,457       | 14,560164  |

a)

| SAMPLE INFORMATION |                                  |                     |                                                |
|--------------------|----------------------------------|---------------------|------------------------------------------------|
| Sample Name:       | Conjugate 2 HCl DMSO 120h RT (2) | Acquired By:        | tobiaszj                                       |
| Sample Type:       | Unknown                          | Acq. Method Set:    | Indolochinoliny                                |
| Vial:              | 5                                | Processing Method:  | Indolochinoliny Con 2                          |
| Injection #:       | 1                                | Channel Name:       | 330 nm                                         |
| Injection Volume:  | 40,00 ul                         | Proc. Chnl. Descr.: | PDA 330,0 nm (PDA 190.0 to 800.0 nm at 1.2 nm) |
| Run Time:          | 25,0 Minutes                     |                     |                                                |

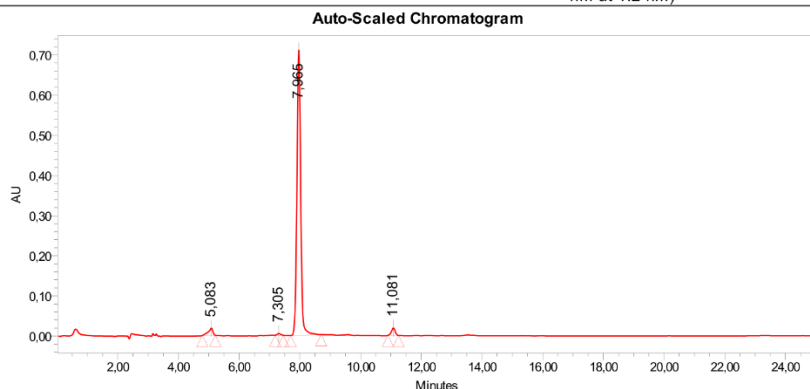

**Peak Results**

|   | Name | RT     | Area    | % Area | SymmetryFactor | Baseline Start (min) | Baseline End (min) | Selectivity | Resolution |
|---|------|--------|---------|--------|----------------|----------------------|--------------------|-------------|------------|
| 1 |      | 5,083  | 183802  | 2,81   | 0,708198       | 4,783                | 5,217              |             |            |
| 2 |      | 7,305  | 35293   | 0,54   | 1,118553       | 7,183                | 7,450              | 1,544       | 9,322693   |
| 3 |      | 7,965  | 6165959 | 94,22  | 1,016905       | 7,700                | 8,700              | 1,105       | 3,014682   |
| 4 |      | 11,081 | 159193  | 2,43   | 0,940313       | 10,900               | 11,250             | 1,447       | 13,877319  |

b)

**Figure S19.** Stability of 9-[(2-hydroxy)cinnamoyl]amino]-5,11-dimethyl-5*H*-indolo[2,3-*b*]quinoline (2) dihydrochloride in DMSO solution at ambient temperature : **a)** at starting point "0" **b)** after 120 h
